# Supplementary material
Source: Springer Nature journal article supplement (https://www.springermedizin.de/resource/supplementary/12985_2009_774_MOESM1_ESM.pdf/9608992)

1000

2000

3000

4000

5000

6000

nt

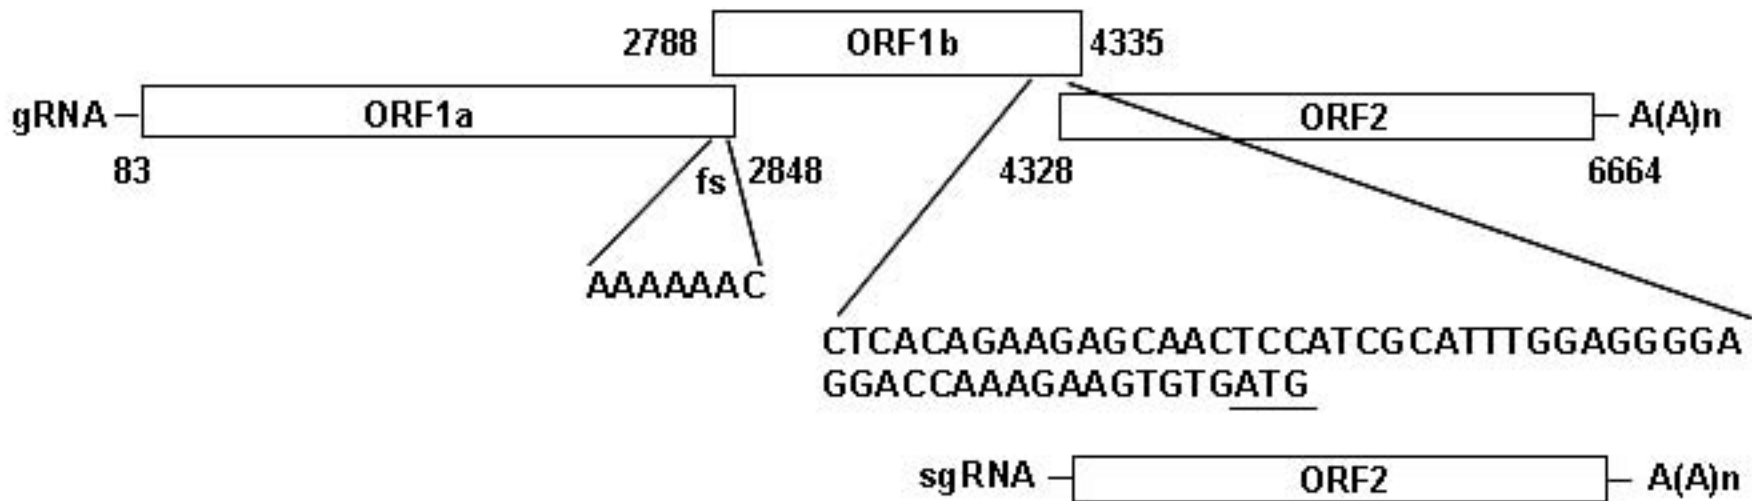

Supplement: MOESM1 [file 9608992]
